# Supplementary material
Source: publisher figshare collection journal article supplement (https://acs.figshare.com/ndownloader/files/9335449)
Supplement: Supplementary file 1 [file 9335449]

## Supporting information

# A Facile Pyrolyzed N-doped Binder Network for Stable Si anodes

*Zhenggang Zhang,<sup>a,1</sup> Yang Jiang,<sup>a,b,1</sup> Zhe Peng,<sup>\*,a</sup> Shanshan Yang,<sup>a</sup> Huan Lin,<sup>a</sup> Meng Liu,<sup>a</sup> Deyu  
Wang<sup>\*,a</sup>*

a. Ningbo Institute of Materials Technology and Engineering, Chinese Academy of Sciences,  
Ningbo 315201, China.

b. Faculty of Materials Science and Chemical Engineering, Ningbo University, Ningbo 315211,  
China.

<sup>1</sup>These authors contribute equally to this work.

### Corresponding Author

\*Zhe Peng, E-mail: pengzhe@nimte.ac.cn

\*Deyu Wang, E-mail: wangdy@nimte.ac.cn

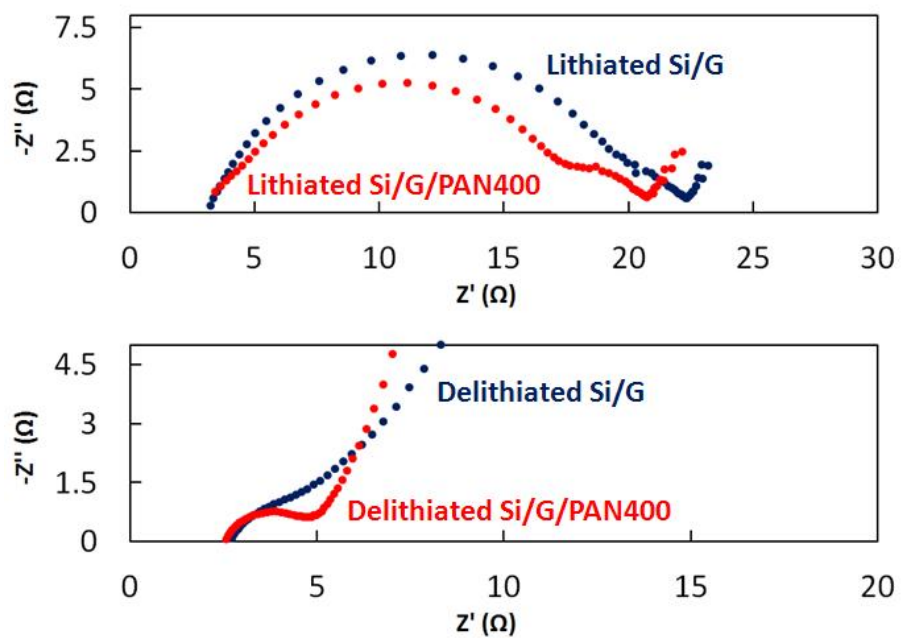

**Figure S1.** Electrochemical Impedance Spectra of the Si/G and Si/G/PAN400 anodes at lithiated and delithiated states. The depressed semicircles are related to the interfacial charge transfer impedances.

**(a)**

PAN

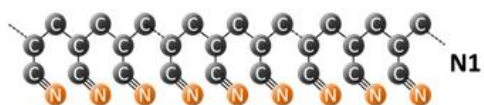

N1 : cyanic group

N2 : pyridinic group

N3 : substitutional graphite group

**(b)**

PAN pyrolyzed at 400°C

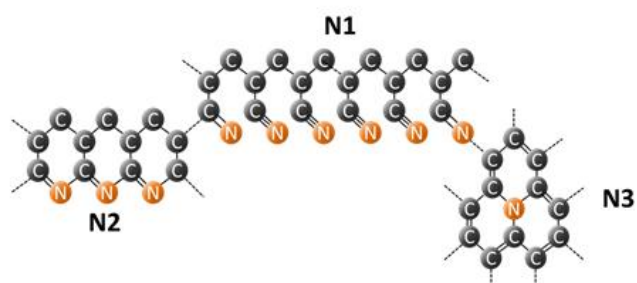

**Figure S2.** Molecular structures of (a) pristine PAN and (b) its pyrolyzed state at 400 °C.

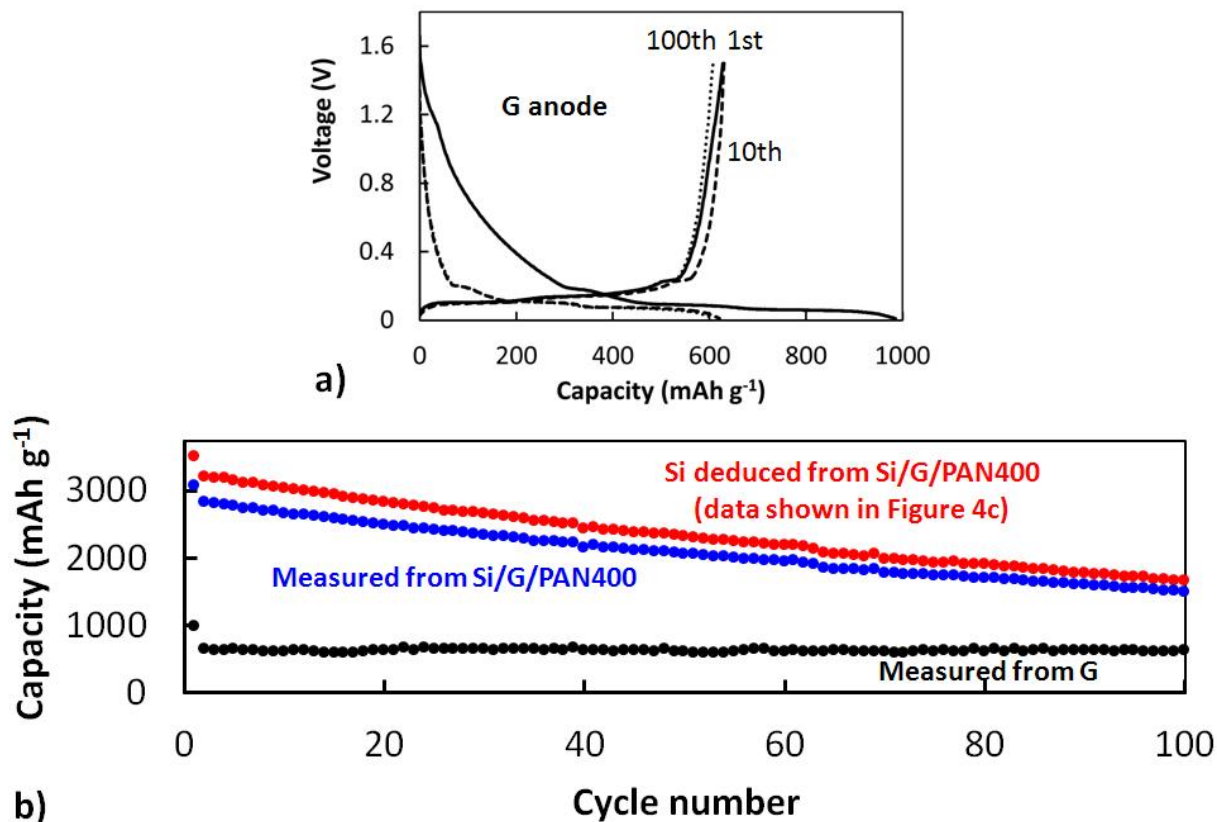

**Figure S3.** (a) Discharge-charge curves of an electrode consisting of pure G used in this work; (b) Measured discharge capacities of G and Si/G/PAN400 anodes and the deduced capacity contribution of the Si particles in the Si/G/PAN400 anode. As shown in (a), a stable discharge capacity of  $\sim 600 \text{ mAh g}^{-1}$  was achieved for the G anode. It was based on this discharge capacity of G and the measured overall discharge capacity of Si/G/PAN400, we have deduced the capacity contribution of Si particles in the composite anode, as shown in (b). The same calculation has been applied for the Si/G anode.

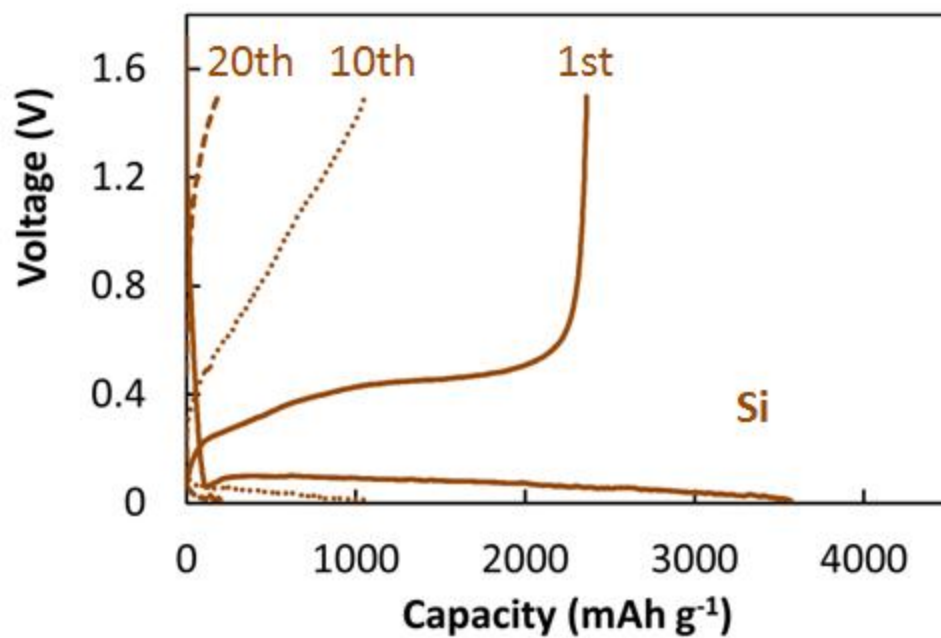

**Figure S4.** Discharge-charge curves of Si anode, at a current density of 800 mA g<sup>-1</sup>.

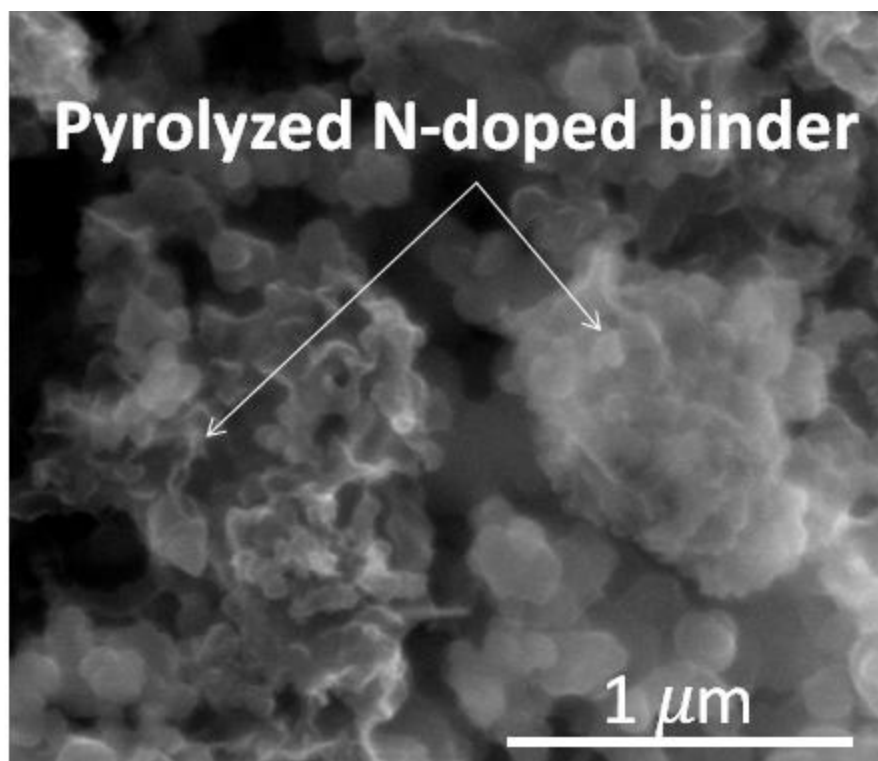

**Figure S5.** SEM image of the pyrolyzed N-doped binder network on single Si particles without dispersion in graphene sheets. As shown, the pyrolyzed binder network formed on the single Si particles is not well cross-linked, and may be less efficacious to provide cycling stability of Si particles.

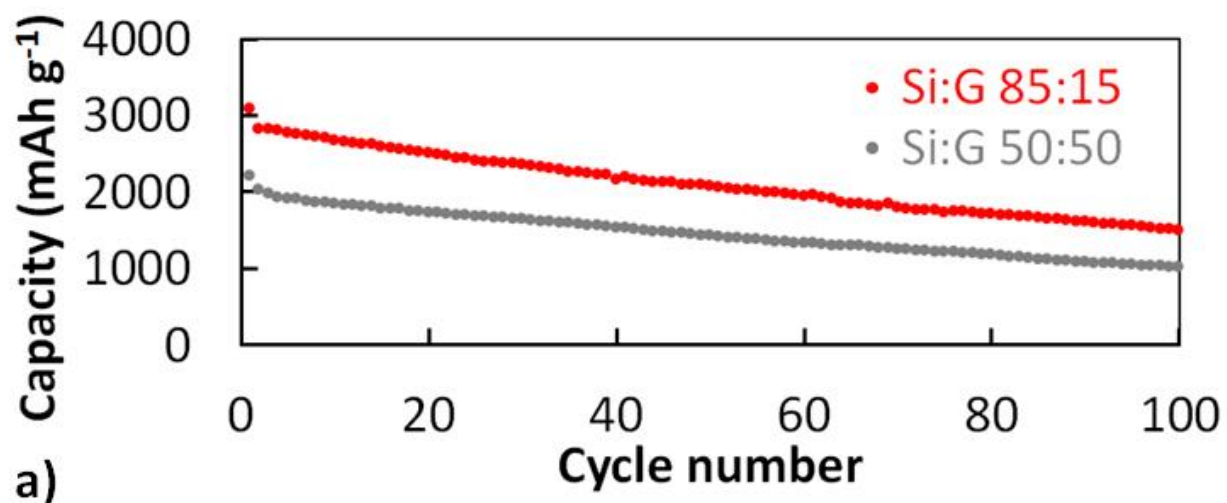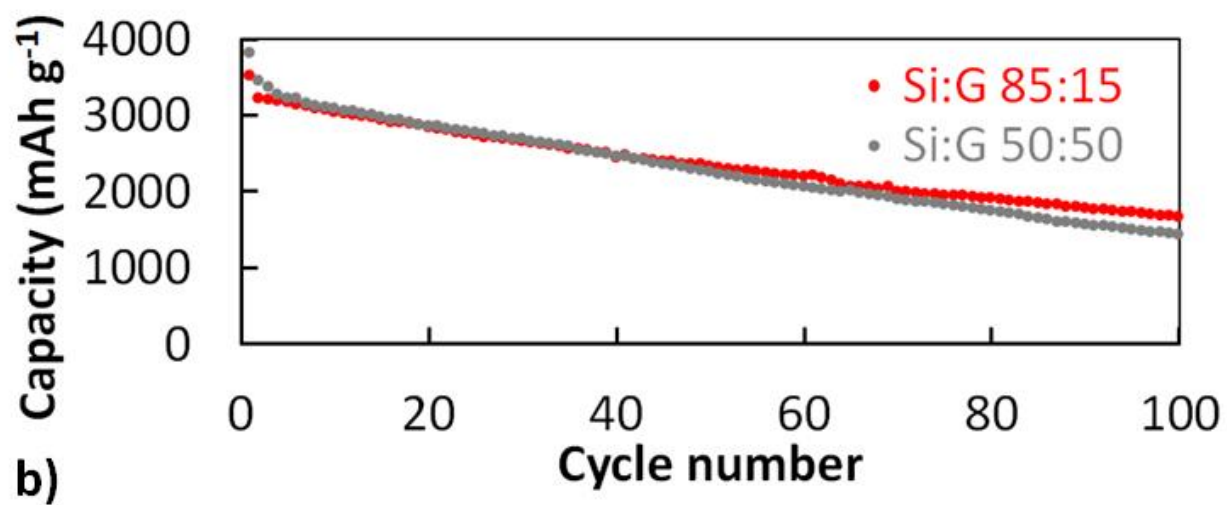

**Figure S6.** (a) Overall discharge capacities of the Si/G/PAN400 anodes with Si:G weight ratio of 85:15 and 50:50; (b) Capacity contributions of the Si particles in the Si/G/PAN400 anodes with Si:G weight ratio of 85:15 and 50:50.

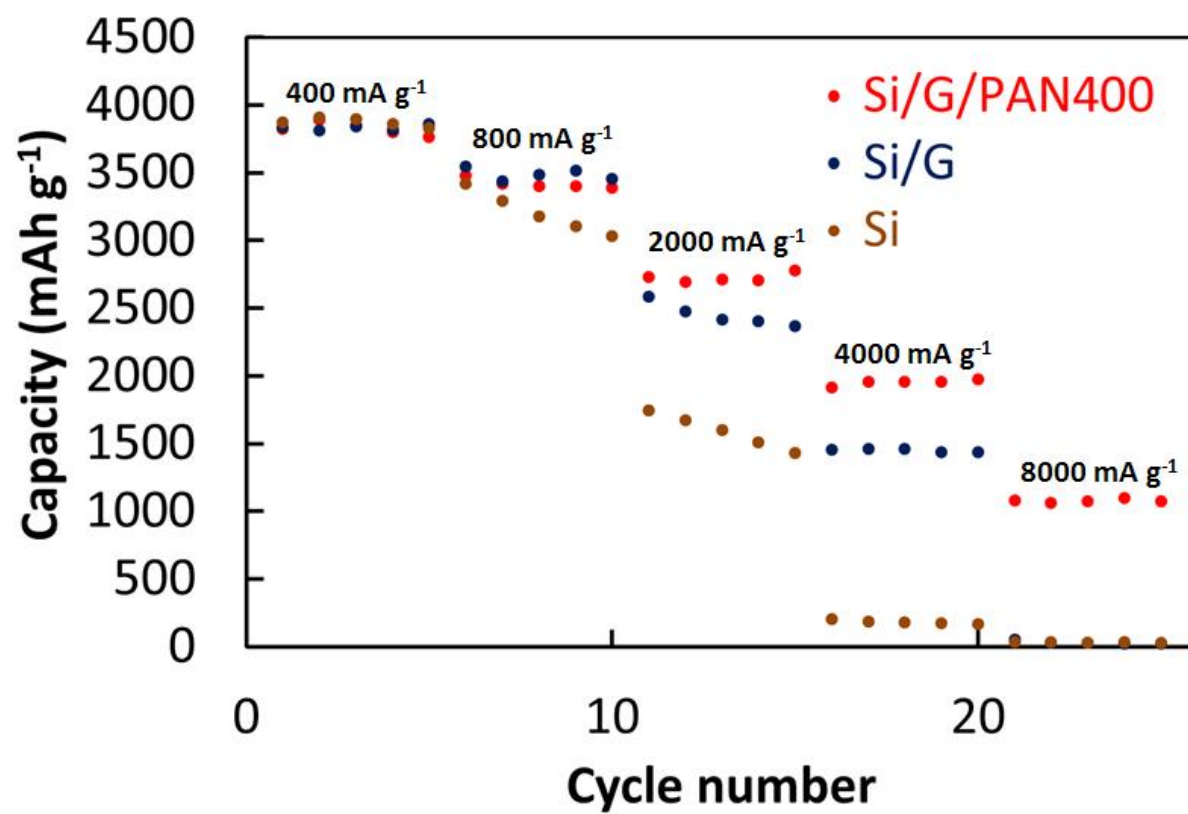

**Figure S7.** Rate capability tests for the Si, Si/G and Si/G/PAN400 anodes.



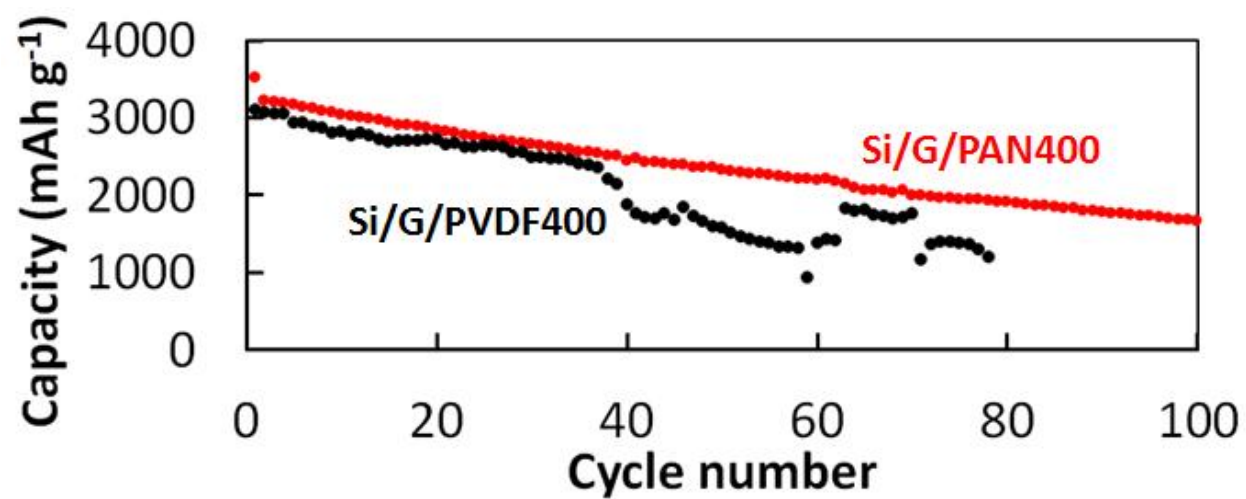

**Figure S8.** Cycling performances of Si/G/PAN400 and Si/G/PVDF400 anodes.
